# Supplementary material for: Identification of Tumor Antigens and Immune Subtypes for the Development of mRNA Vaccines and Individualized Immunotherapy in Soft Tissue Sarcoma
Source: MDPI journal article supplement (doi:10.3390/cancers14020448), 2022-01-17
Supplement: s1 [file s1]

# Identification of Tumor Antigens and Immune Subtypes for the Development of mRNA Vaccines and Individualized Immunotherapy in Soft Tissue Sarcoma

Changwu Wu, Yingjuan Duan, Siming Gong, Georg Osterhoff, Sonja Kallendrusch and Nikolas Schopow

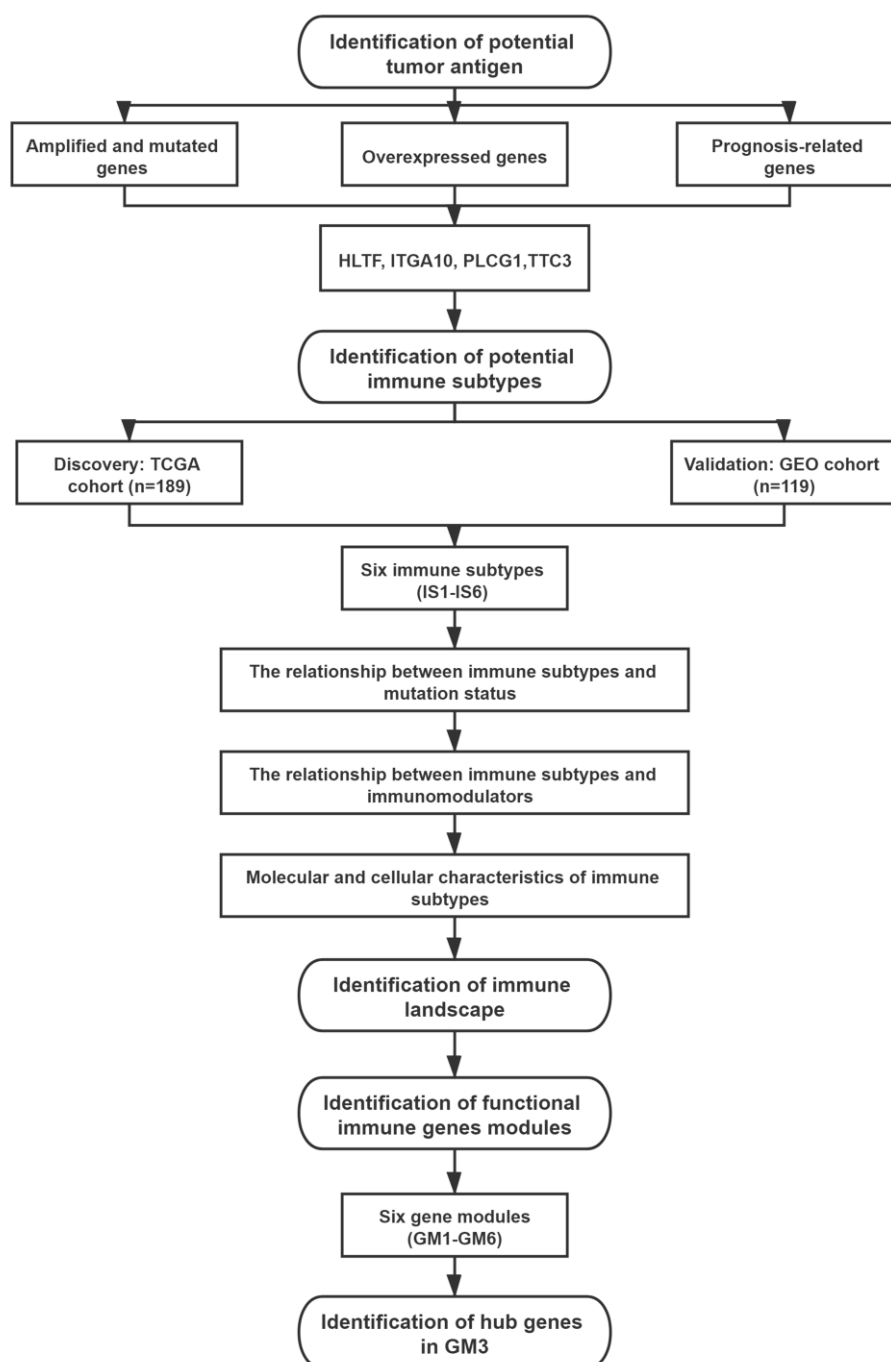

Figure S1. Experimental Setup.

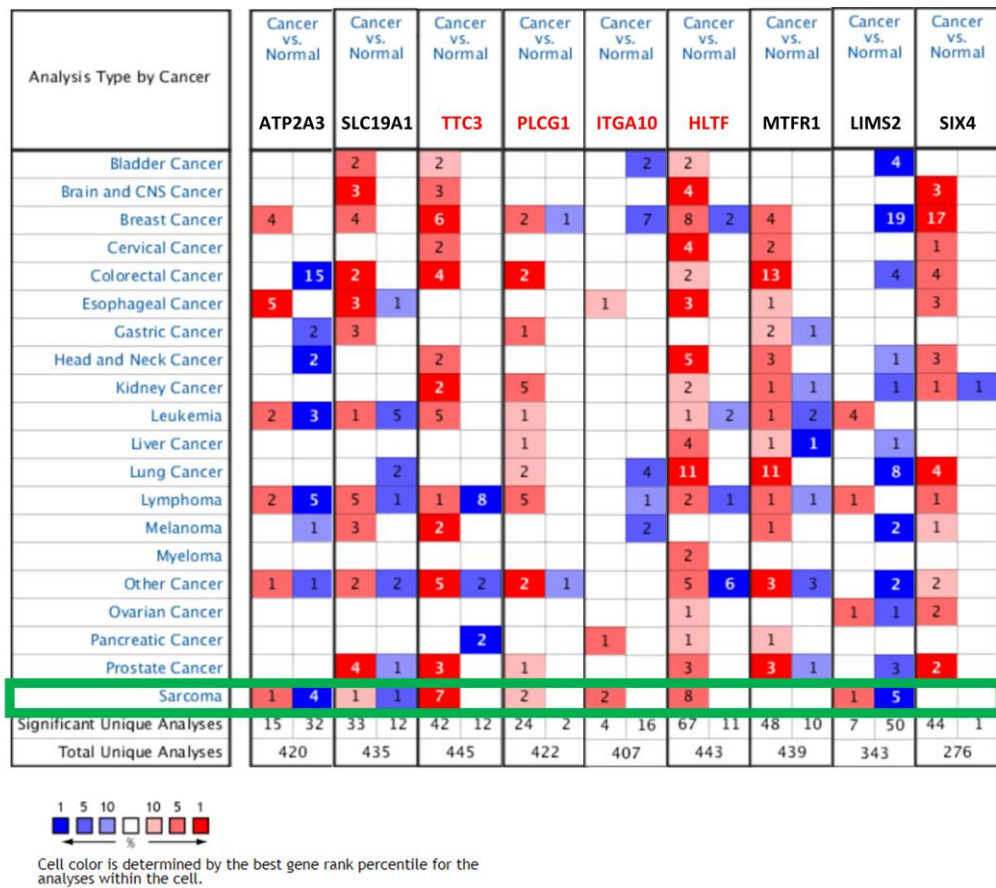

**Figure S2. Identification of potential overexpressed tumor antigens in STS.** Four potential tumor antigens overexpressed in STS compared to normal tissue in the Oncomine database. The red indicates that the gene expression is up-regulated and the blue indicates that the gene expression is down-regulated. The number indicates the number of analyses.

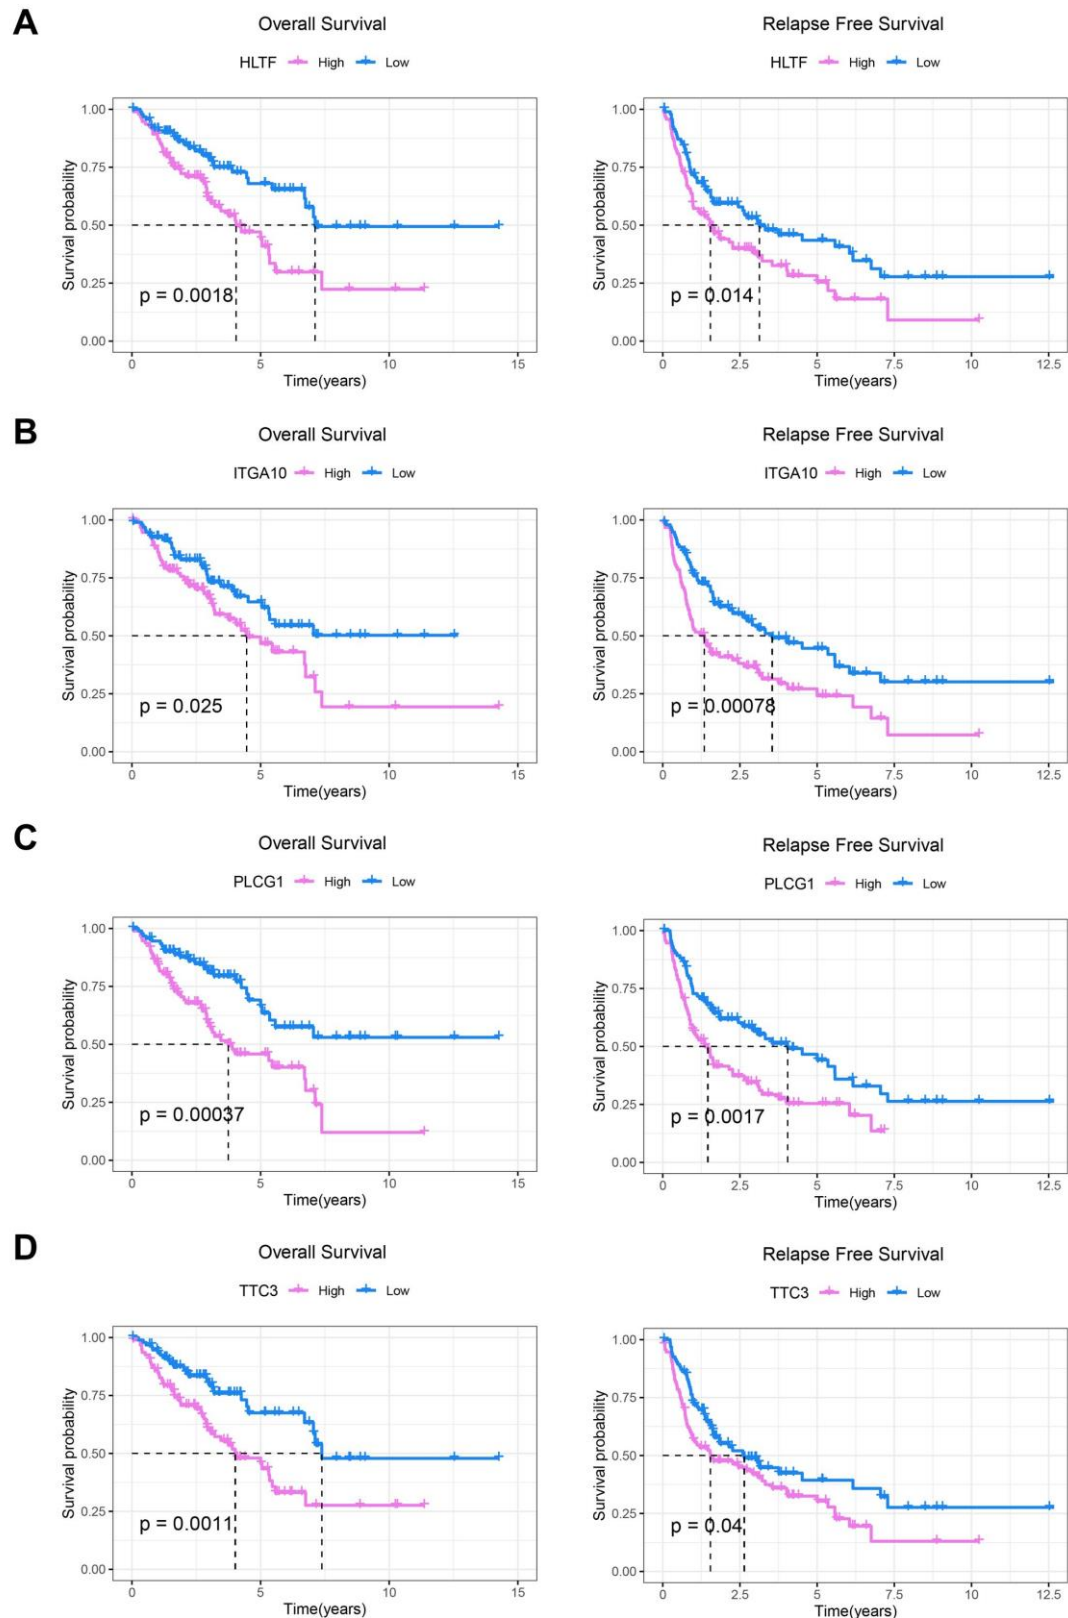

**Figure S3. Identification of tumor antigens associated with STS prognosis.** A-D Kaplan-Meier curves comparing OS and RFS in STS for groups with different expression of HLTF (A), ITGA10 (B), PLCG1 (C) and TTC3 (D).

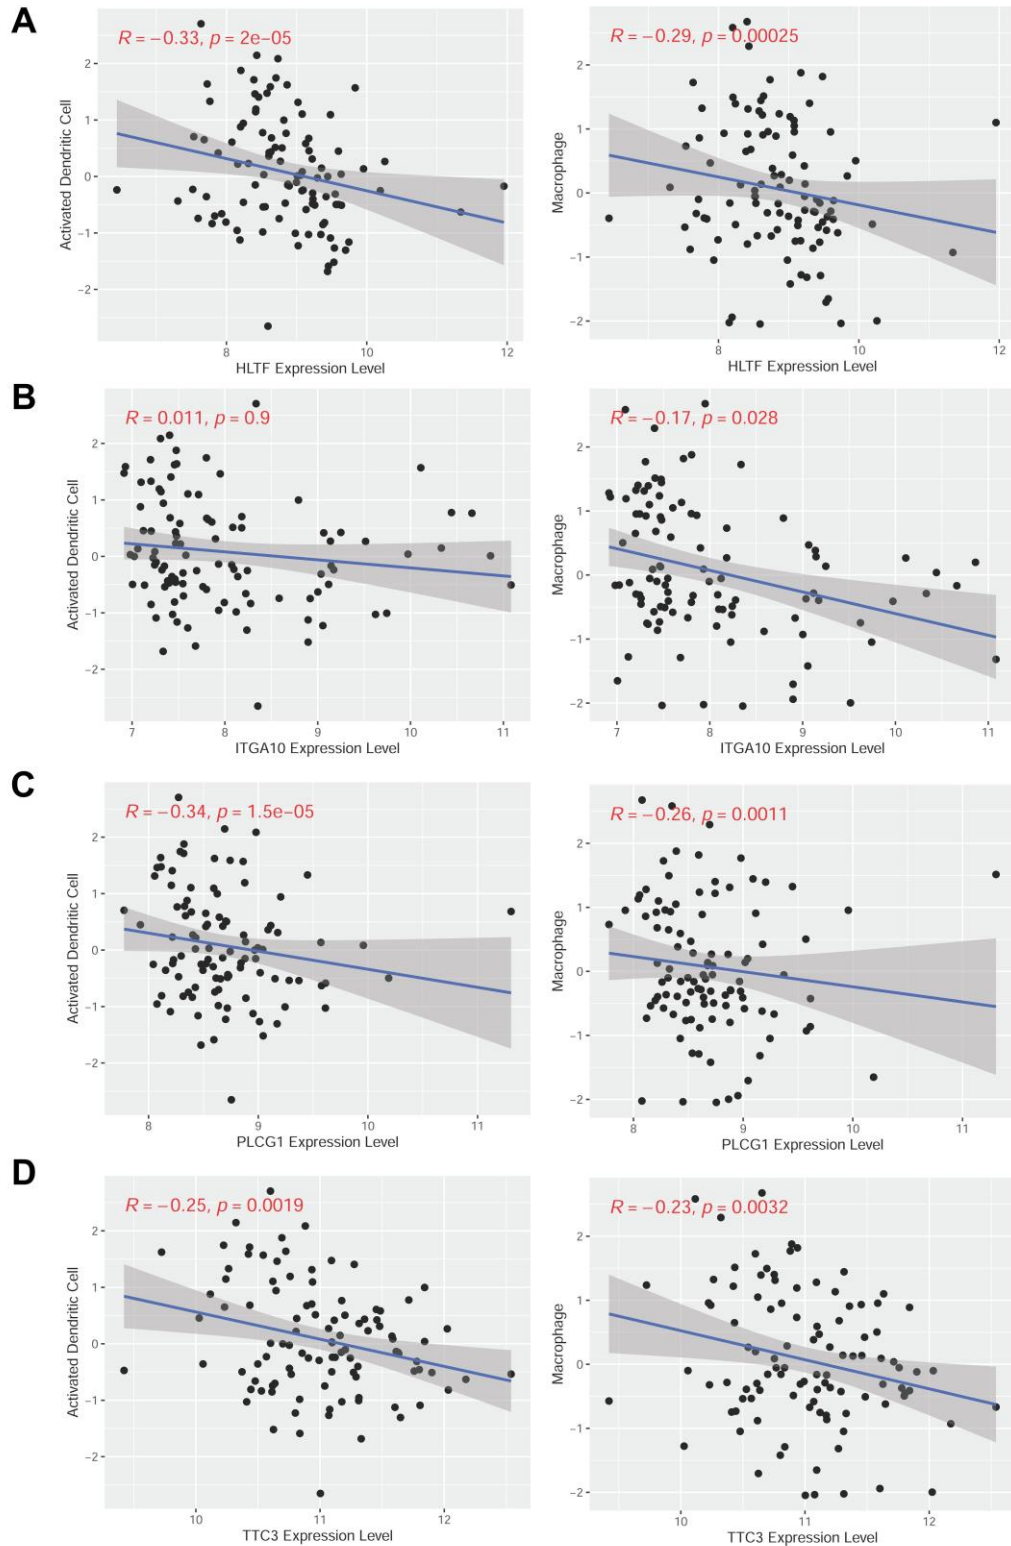

**Figure S4.** Identification of tumor antigens associated with infiltration of antigen-presenting cells in the GEO cohort. A-D Correlation between expression of HLTF (A), ITGA10 (B), PLCG1 (C) and TTC3 (D) and infiltration levels of dendritic cells and macrophages in STS.

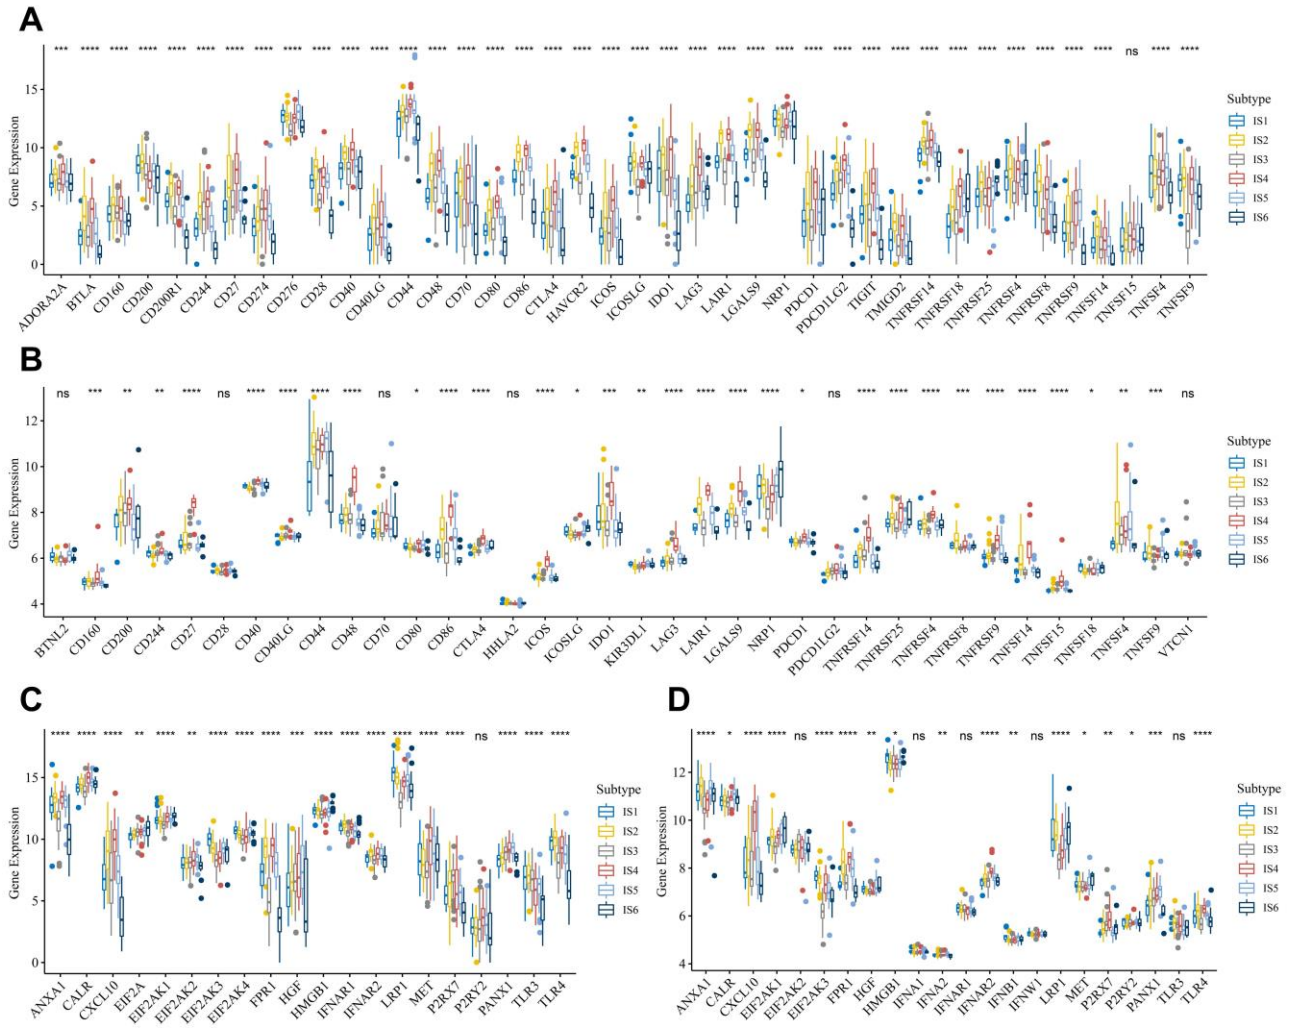

**Figure S5. Association between immune subtypes and immunomodulators in STS.** A,B Differences in expression levels of ICP-related genes among STS immune subtypes in TCGA (A) and GEO (B) cohorts. C,D Differences in expression levels of ICD-related genes among STS immune subtypes in TCGA (C) and GEO (D) cohorts. \*  $p < 0.05$ , \*\*  $p < 0.01$ , \*\*\*  $p < 0.001$ , \*\*\*\*  $p < 0.0001$ .

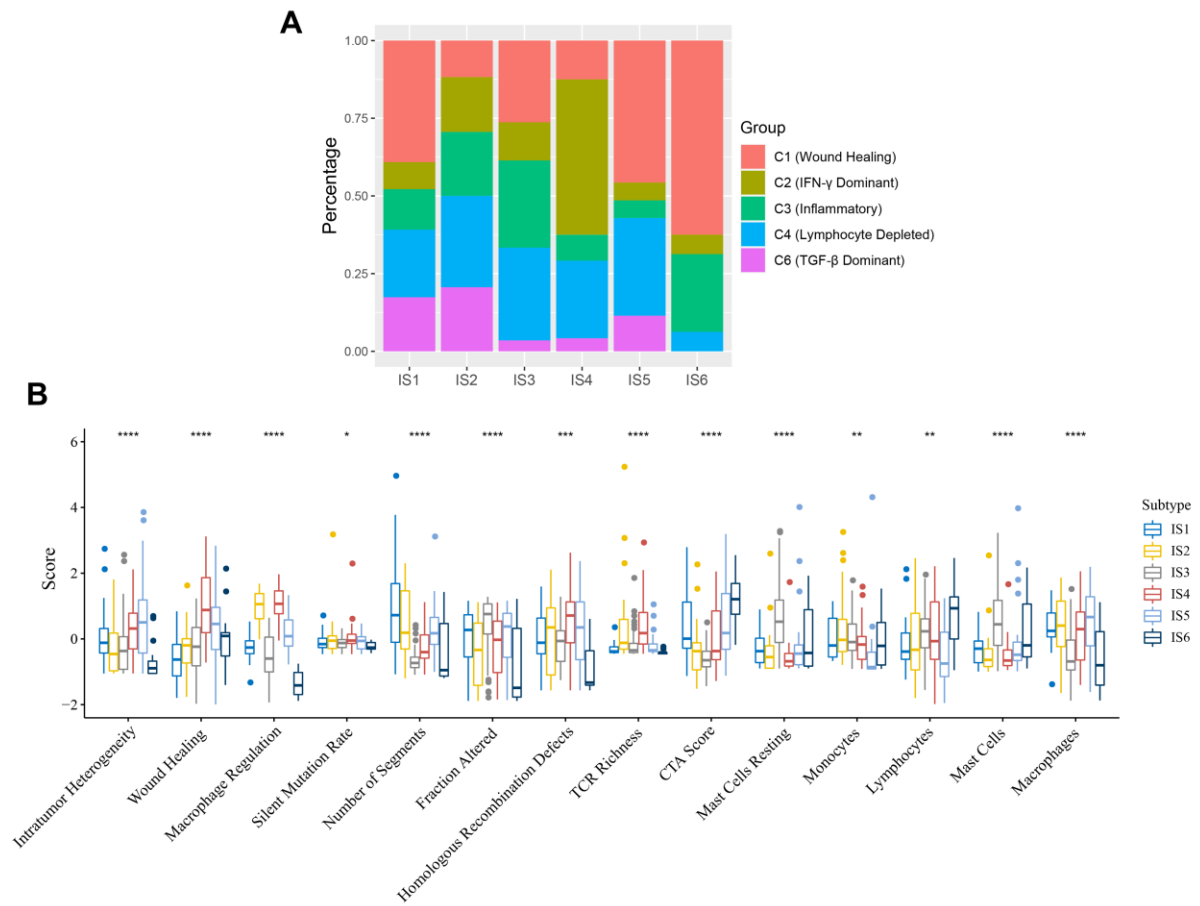

**Figure S6. Molecular characteristic of immune subtypes in STS.** **A** The distribution of six pan-cancer immune subtypes, defined by Thorsson et al., in the six STS immune subtypes. **B** Immune-related molecular signatures with significant differences among STS immune subtypes. \*  $p < 0.05$ , \*\*  $p < 0.01$ , \*\*\*  $p < 0.001$ , \*\*\*\*  $p < 0.0001$ .

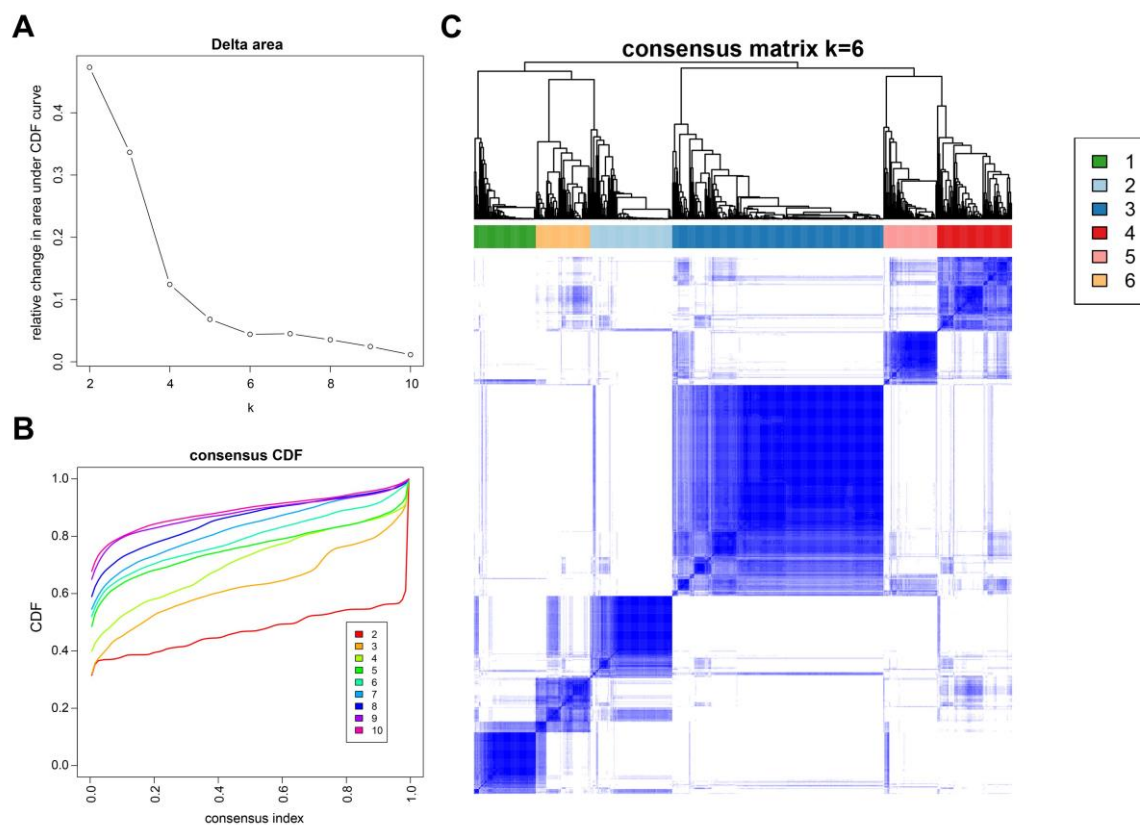

**Figure S7. Identification of potential immune-related gene modules in STS. A-C** Delta area curve (A), cumulative distribution function curve (B) and consensus heatmap (C) of immune-related gene expression profile in TCGA cohort.



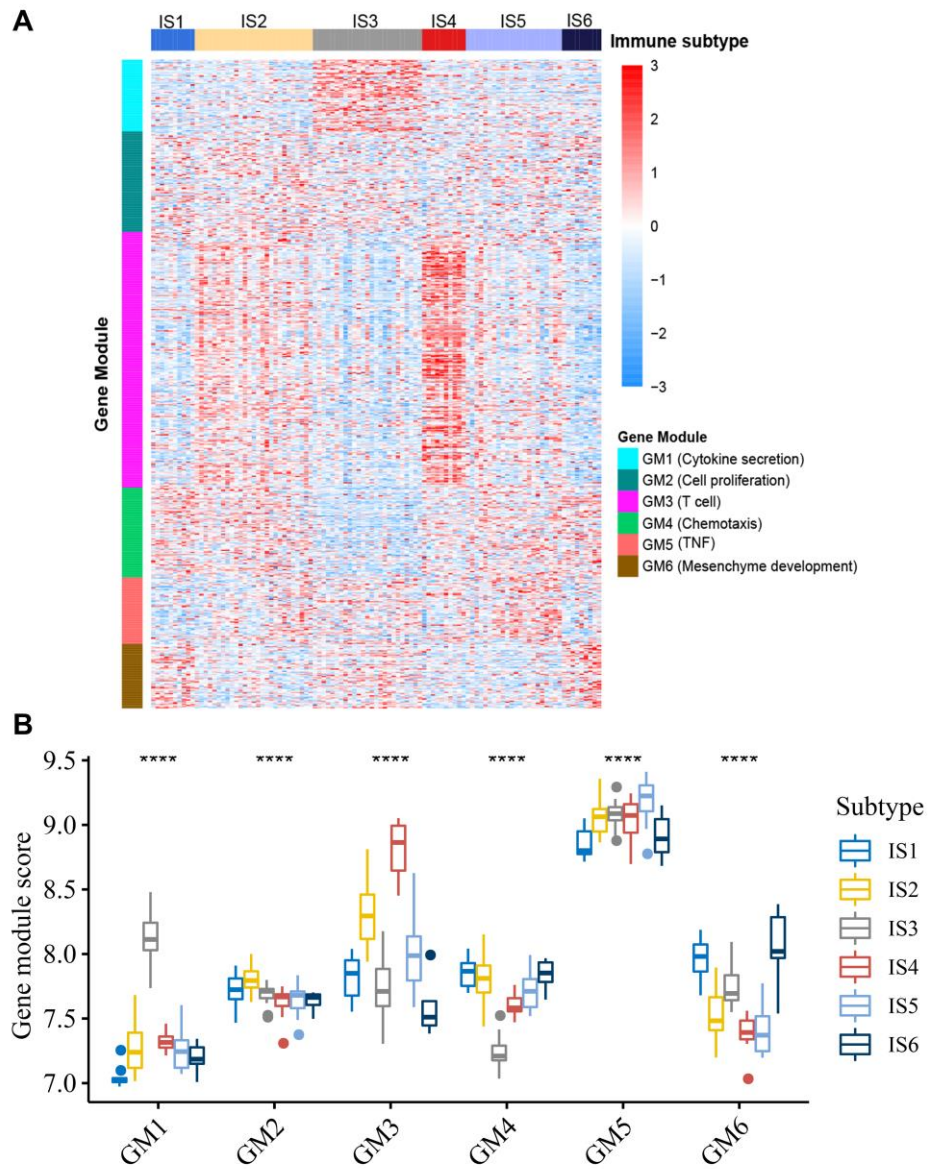

**Figure S8. Functional immune genes modules in the GEO cohort.** **A** Heatmap of ISs and GMs in the GEO cohort. Genes are ordered based on the GMs, and patients are arranged based on their ISs. **b** Box plots of the GM expression patterns of six immune subtypes in the GEO cohort. \*\*\*\*  $p < 0.0001$ .





**Table S1.** Characteristics of STS samples in TCGA and GEO cohorts.

| Characteristics               | TCGA (n=189)  | GEO (n=103)  |
|-------------------------------|---------------|--------------|
| <b>Histological type</b>      |               |              |
| DDLPS                         | 49 (25.93 %)  | 46 (44.66 %) |
| LMS                           | 68 (35.98 %)  | 26 (25.24 %) |
| UPS                           | 41 (21.69 %)  | NA           |
| MFS                           | 17 (8.99 %)   | 31 (30.10%)  |
| SS                            | 10 (5.29 %)   | NA           |
| MPNST                         | 4 (2.12 %)    | NA           |
| <b>Pathologic tumor size</b>  |               |              |
| ≤ 10.5 cm                     | 95 (50.26 %)  | NA           |
| > 10.5 cm                     | 94 (49.74 %)  | NA           |
| <b>Radiotherapy</b>           |               |              |
| Yes                           | 54 (28.57 %)  | NA           |
| No                            | 135 (71.43 %) | NA           |
| <b>Pharmaceutical therapy</b> |               |              |
| Yes                           | 45 (23.81%)   | NA           |
| No                            | 144 (76.19%)  | NA           |
| <b>FNCLCC grade</b>           |               |              |
| 1                             | 10(5.29%)     | NA           |
| 2                             | 105 (55.56%)  | NA           |
| 3                             | 74 (39.15%)   | NA           |
| <b>Vital status</b>           |               | -            |
| Alive                         | 117 (61.90%)  | NA           |
| Dead                          | 72 (38.10%)   | NA           |
| <b>Relapse status</b>         |               |              |
| Relapse                       | 114 (60.32%)  | NA           |
| Non- Relapse                  | 75 (39.68%)   | NA           |

DDLPS: dedifferentiated liposarcoma; LMS: leiomyosarcoma; UPS: undifferentiated pleomorphic sarcoma; MFS: myxofibrosarcoma; SS: synovial sarcoma; MPNST: malignant peripheral nerve sheath tumor; NA: no data or data unavailable.

**Table S2.** IGP was estimated for each immune subtype in the validation cohort.

| Immune subtype | IS1   | IS2   | IS3   | IS4   | IS5   | IS6   |
|----------------|-------|-------|-------|-------|-------|-------|
| IGP value      | 0.857 | 0.625 | 1.000 | 0.640 | 0.588 | 0.667 |

**Table S3.** Functional enrichment analysis of gene modules.

| Gene module | Annotation         | Top 5 enriched biological processes                                                                        |
|-------------|--------------------|------------------------------------------------------------------------------------------------------------|
| GM1         | Cytokine secretion | GO:0009755~hormone-mediated signaling pathway                                                              |
|             |                    | GO:0007162~negative regulation of cell adhesion                                                            |
|             |                    | GO:0030522~intracellular receptor signaling pathway                                                        |
|             |                    | GO:0043401~steroid hormone mediated signaling pathway                                                      |
|             |                    | GO:0050707 ~regulation of cytokine secretion                                                               |
| GM2         | Cell proliferation | GO:0050673~epithelial cell proliferation                                                                   |
|             |                    | GO:0033002~muscle cell proliferation                                                                       |
|             |                    | GO:0048638~regulation of developmental growth                                                              |
|             |                    | GO:0048015~phosphatidylinositol-mediated signaling                                                         |
|             |                    | GO:0048017~inositol lipid-mediated signaling                                                               |
| GM3         | T cell             | GO:0050900~leukocyte migration                                                                             |
|             |                    | GO:0042110~T cell activation                                                                               |
|             |                    | GO:0060326~cell chemotaxis                                                                                 |
|             |                    | GO:0030595~leukocyte chemotaxis                                                                            |
|             |                    | GO:0034341~response to interferon-gamma                                                                    |
| GM4         | Chemotaxis         | GO:0050920~regulation of chemotaxis                                                                        |
|             |                    | GO:0061138~morphogenesis of a branching epithelium                                                         |
|             |                    | GO:0001763~urogenital system development                                                                   |
|             |                    | GO:0001763~morphogenesis of a branching structure                                                          |
|             |                    | GO:0048608~reproductive structure development                                                              |
| GM5         | TNF                | GO:0033209~tumor necrosis factor-mediated signaling pathway                                                |
|             |                    | GO:0002479~antigen processing and presentation of exogenous peptide antigen via MHC class I, TAP-dependent |
|             |                    | GO:0042590~antigen processing and presentation of exogenous peptide antigen via MHC class I                |
|             |                    | GO:0002833~positive regulation of response to biotic stimulus                                              |
|             |                    | GO:0002223~stimulatory C-type lectin receptor signaling pathway                                            |

|     |                        |                                                |
|-----|------------------------|------------------------------------------------|
| GM6 | Mesenchyme development | GO:0060485~mesenchyme development              |
|     |                        | GO:0048762~mesenchymal cell differentiation    |
|     |                        | GO:0050919~negative chemotaxis                 |
|     |                        | GO:0048843~semaphorin-plexin signaling pathway |
|     |                        | GO:0048863~stem cell differentiation           |

**Table S4.** Univariate analysis of the prognostic value of gene modules in terms of OS/RFS in STS.

| Gene Module (GM) | Overall survival |           |         | Relapse-free survival |           |         |
|------------------|------------------|-----------|---------|-----------------------|-----------|---------|
|                  | HR               | 95%CI     | P-value | HR                    | 95%CI     | P-value |
| GM1 score        | 0.80             | 0.63~0.99 | 0.049   | 0.92                  | 0.77~1.10 | 0.368   |
| GM2 score        | 0.89             | 0.54~1.46 | 0.646   | 0.93                  | 0.62~1.40 | 0.716   |
| GM3 score        | 0.79             | 0.65~0.97 | 0.027   | 0.859                 | 0.73~1.01 | 0.078   |
| GM4 score        | 1.23             | 0.91~1.66 | 0.175   | 1.01                  | 0.79~1.27 | 0.966   |
| GM5 score        | 0.89             | 0.53~1.53 | 0.690   | 0.993                 | 0.65~1.52 | 0.972   |
| GM6 score        | 1.22             | 0.91~1.65 | 0.184   | 1.05                  | 0.83~1.32 | 0.689   |

**Table S5.** Multivariate analysis of the prognostic value of gene modules in terms of OS/RFS in STS.

| Characteristics                     | Overall survival |           |         | Relapse-free survival |           |         |
|-------------------------------------|------------------|-----------|---------|-----------------------|-----------|---------|
|                                     | HR               | 95%CI     | P-value | HR                    | 95%CI     | P-value |
| Age (Continuous)                    | 1.03             | 1.01~1.05 | 0.007   | 1.01                  | 0.99~1.00 | 0.390   |
| Gender (Male vs. Female)            | 0.93             | 0.55~1.59 | 0.794   | 1.24                  | 0.83~1.85 | 0.301   |
| Pathological tumor size (cm)        | 1.05             | 1.04~1.08 | <0.001  | 1.04                  | 1.02~1.14 | <0.001  |
| Radiotherapy (Yes vs. No)           | 0.70             | 0.36~1.34 | 0.282   | 1.04                  | 0.67~1.72 | 0.894   |
| Pharmaceutical therapy (Yes vs. No) | 1.73             | 0.95~3.13 | 0.072   | 1.92                  | 1.21~3.01 | 0.005   |
| FNCLCC grade (3 vs. 1/2)            | 1.43             | 0.79~2.61 | 0.240   | 1.592                 | 1.56~2.50 | 0.064   |
| GM1 score                           | 0.79             | 0.49~1.25 | 0.306   | 0.96                  | 0.67~1.40 | 0.802   |
| GM2 score                           | 1.60             | 0.56~4.55 | 0.379   | 1.48                  | 0.68~3.21 | 0.319   |
| GM3 score                           | 0.60             | 0.41~0.87 | 0.008   | 0.70                  | 0.55~1.00 | 0.053   |
| GM4 score                           | 1.17             | 0.61~2.22 | 0.641   | 0.99                  | 0.59~1.71 | 0.970   |
| GM5 score                           | 1.70             | 0.53~5.39 | 0.369   | 1.71                  | 0.69~4.32 | 0.249   |
| GM6 score                           | 0.94             | 0.57~1.56 | 0.822   | 0.93                  | 0.62~1.44 | 0.727   |
